# Supplementary material
Source: PubMed Central journal article supplement (PMC4972198)
Supplement: PRO-25-1420-s001.pdf [file PRO-25-1420-s001.pdf]

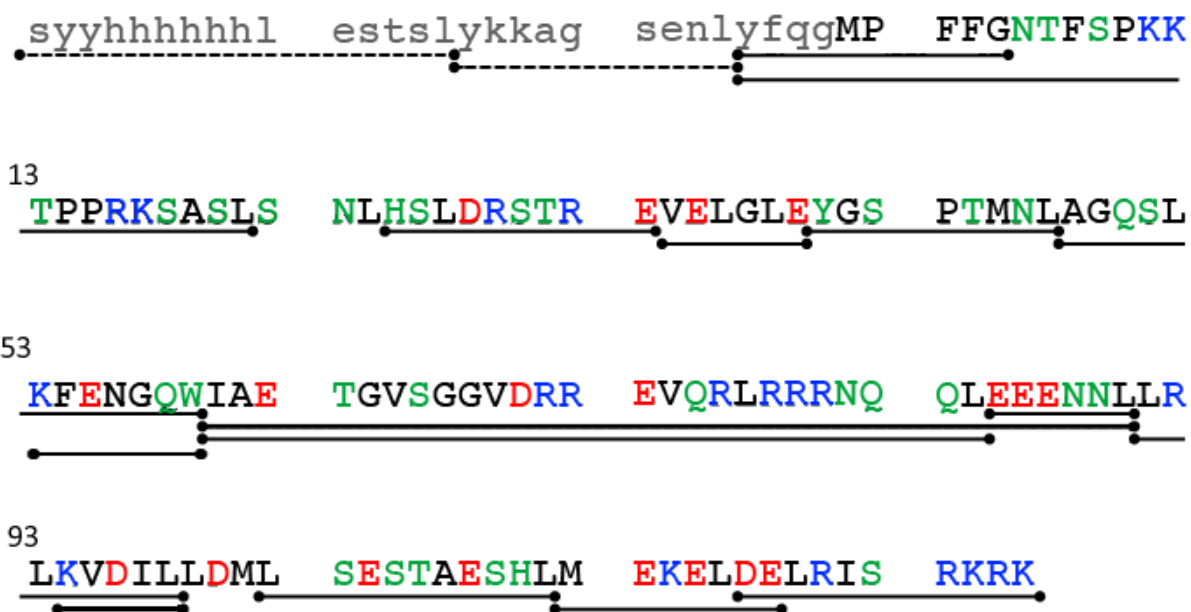

**Supporting Information Figure 1.** Sequence of human Cby and its His tag (lower case, grey colour). Black lines below the sequence are the peptic peptides used in the HDX-MS data analysis, and the broken lines are peptides originating from solely the His-tag. Colour scheme: negatively charged residues in red, positively charged residues in blue, polar residues in green and non-polar residues in black.
