# Supplementary material
Source: PubMed Central journal article supplement (PMC4972198)
Supplement: PRO-25-1420-s002.pdf [file PRO-25-1420-s002.pdf]

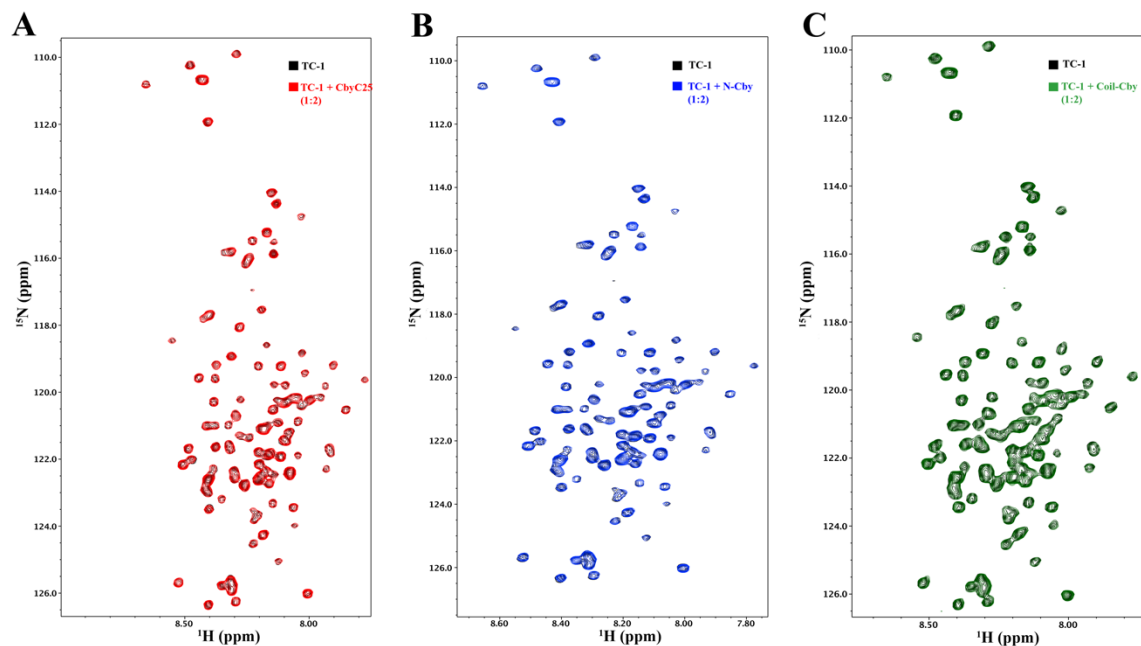

**Supporting Information Figure 2.** **A.** Overlay of the  $^1\text{H}$ - $^{15}\text{N}$  HSQC spectra of TC-1 in the absence (black) and presence (red) of N-Cby at a 1:2 ratio (TC-1:N-Cby). **B.** Overlay of the  $^1\text{H}$ - $^{15}\text{N}$  HSQC spectra of TC-1 in the absence (black) and presence (red) of CbyC25 at a 1:2 ratio (TC-1:CbyC25). **C.** Overlay of the  $^1\text{H}$ - $^{15}\text{N}$  HSQC spectra of TC-1 in the absence (black) and presence (red) of Coil-Cby at a 1:2 ratio (TC-1:Coil-Cby).
