# Supplementary material
Source: PubMed Central journal article supplement (PMC4972198)
Supplement: PRO-25-1420-s003.pdf [file PRO-25-1420-s003.pdf]

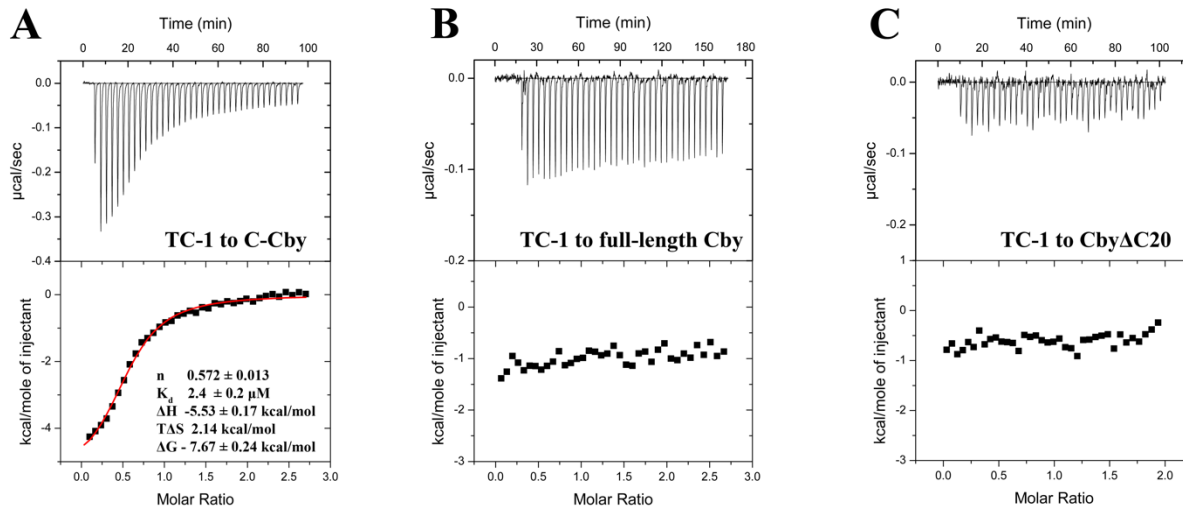

**Supporting Information Figure 3. A.** A duplicate ITC thermal profile of TC-1 binding to C-Cby in 10 mM ammonium acetate. Thermodynamic experimental values are displayed.  $K_d$  is the dissociation constant  $\Delta H$ ,  $\Delta S$  and  $\Delta G$  are the change in enthalpy, entropy and Gibbs free energy upon binding at  $T = 298.15 \text{ K}$ , respectively. **B.** ITC thermal profile of TC-1 binding to full-length Cby in 10 mM sodium acetate, pH 5.0. **C.** ITC thermal profile of TC-1 binding to Cby $\Delta$ C20 in 10 mM ammonium acetate, pH 5.0.
